# Supplementary material
Source: MDPI journal article supplement (https://www.mdpi.com/1424-8247/17/2/197)
Supplement: s1 [file s1]

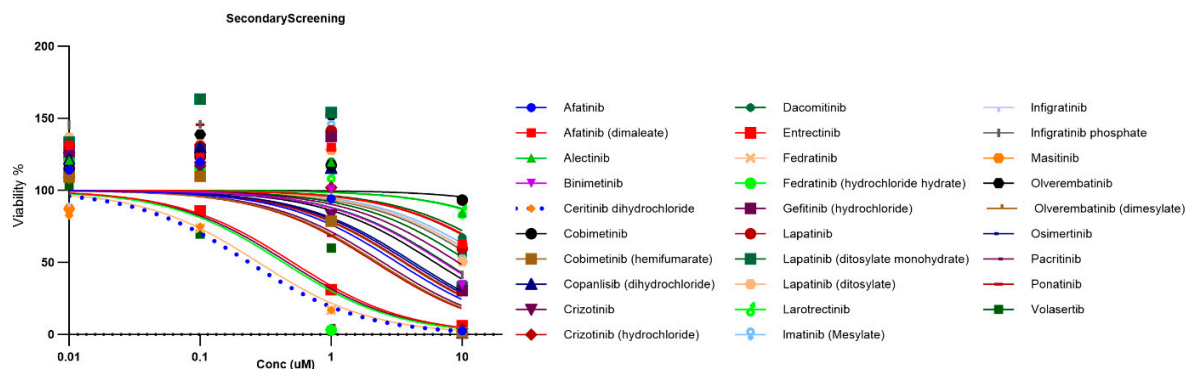

**Figure S1.** Secondary screening of 29 RTKis in KKUM213 cells. 0.01 -10  $\mu$ M of drugs are treated to KKU-M213 cells for 48 hours before MTT assay. Ceritinib dihydrochloride (blue dotted line) is the most sensitive compound to KKU-M213 cells.

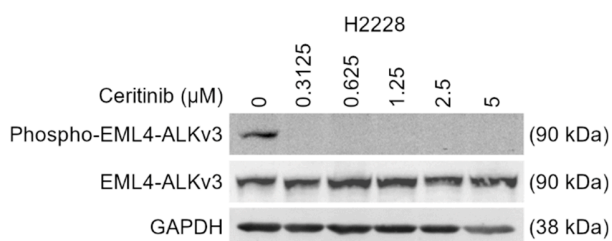

**Figure S2.** Inhibition of ALK phosphorylation by Ceritinib. H2228 (ALK-fusion positive cell line) cells were seeded in 6 well plate and treated with various concentration of ceritinib (0-5  $\mu$ M) for 24 h at 80% confluence and total protein extraction was performed for WB analysis. GAPDH was used as loading control.

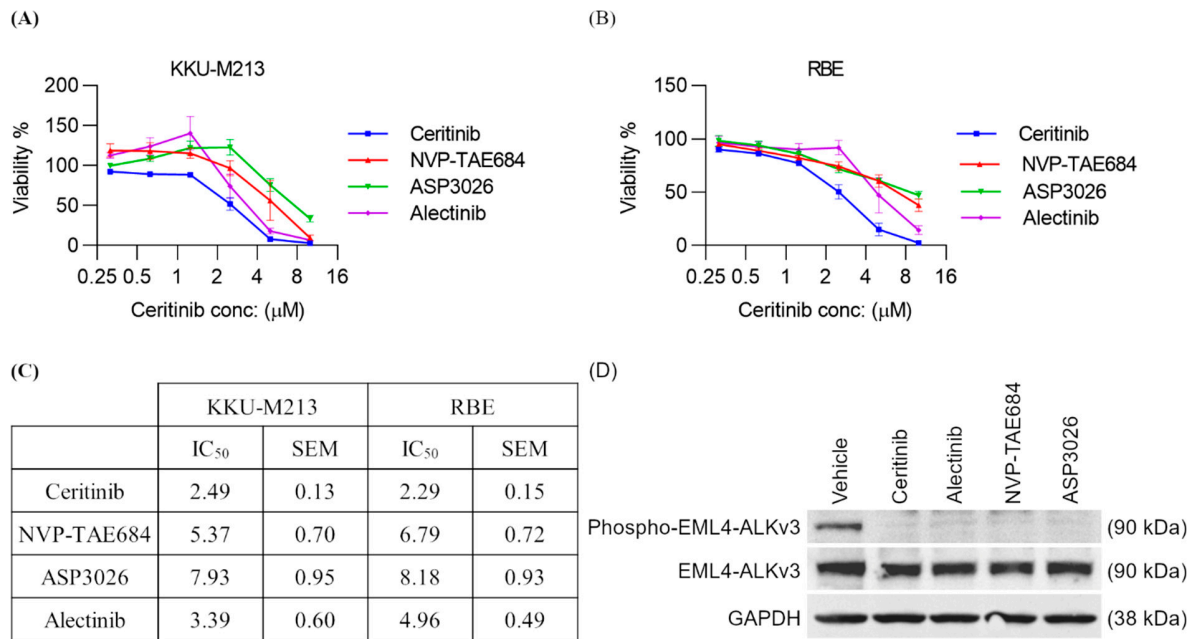

**Figure S3.** Ceritinib is more cytotoxic to CCA cells than other ALKi(s). Viability of (A) KKU-M213 and (B) RBE cells line after treatment with Ceritinib, NVP-TAE684, ASP3036 or Alectinib for 72 hours. (C) IC<sub>50</sub>s of ALKi(s) in KKU-M213 and RBE cells. (D) ALK phosphorylation inhibitory action of ALKi(s) in H2228 as positive control cells.

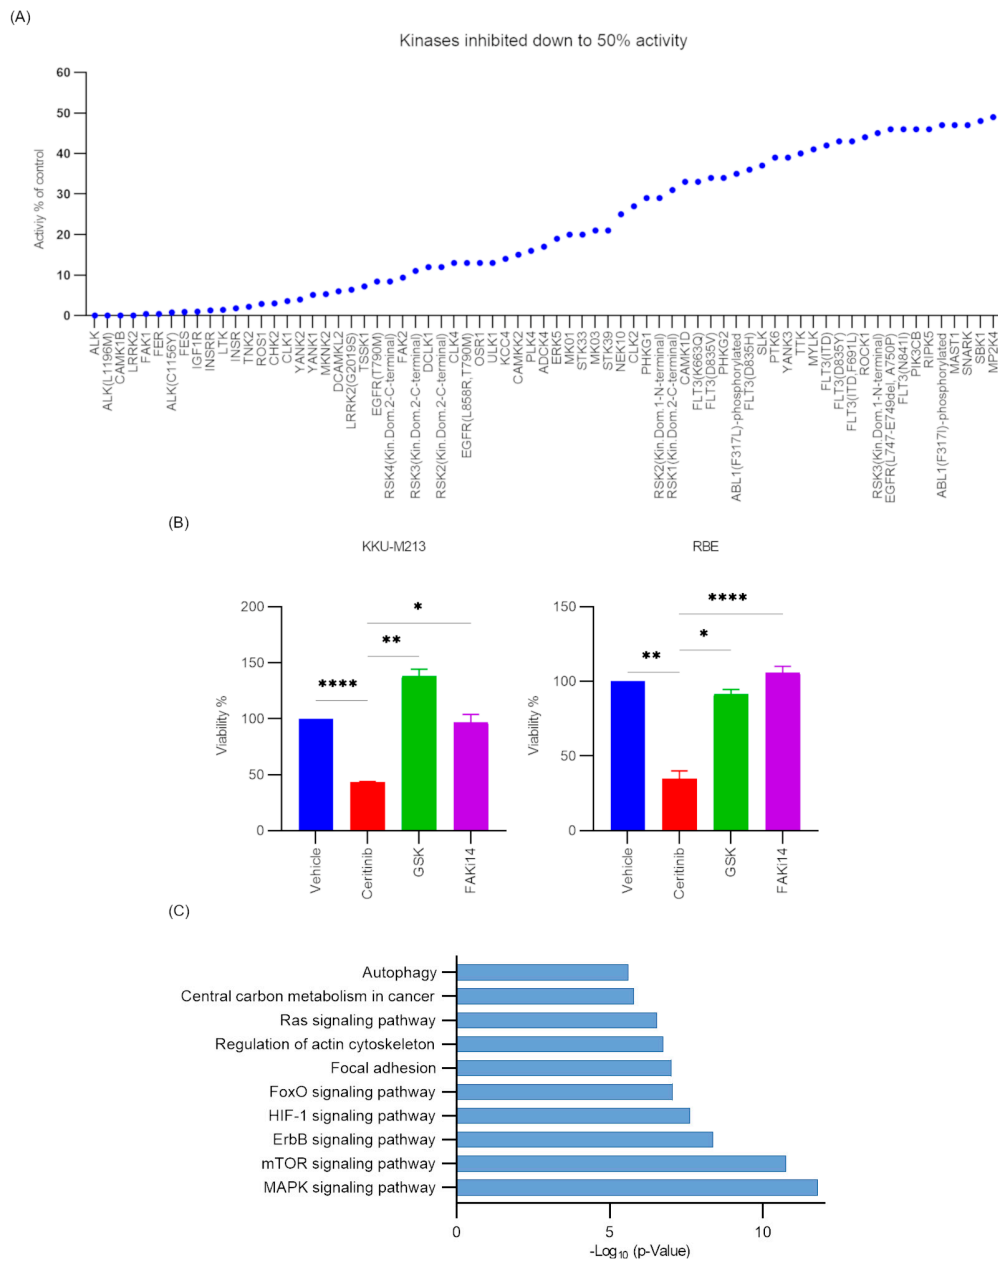

**Figure S4.** Signaling pathways predicted to be altered by Ceritinib treatment in CCA. **(A)** Kinases inhibited by ceritinib up to 50% at 1  $\mu$ M concentration (cell free KINOMEscan) **(B)** CCA cell viability % after ceritinib, GSK1904529A and FAK inhibitor 14 treatment for 24 h in KKU-M213 and RBE cells **(C)** Gene enrichment analysis (KEGG pathway) of 57 kinases inhibited by ceritinib. \* $p < 0.005$ , \*\* $p < 0.01$ , \*\*\* $p < 0.001$ , \*\*\*\* $p < 0.0001$  compared to vehicle.

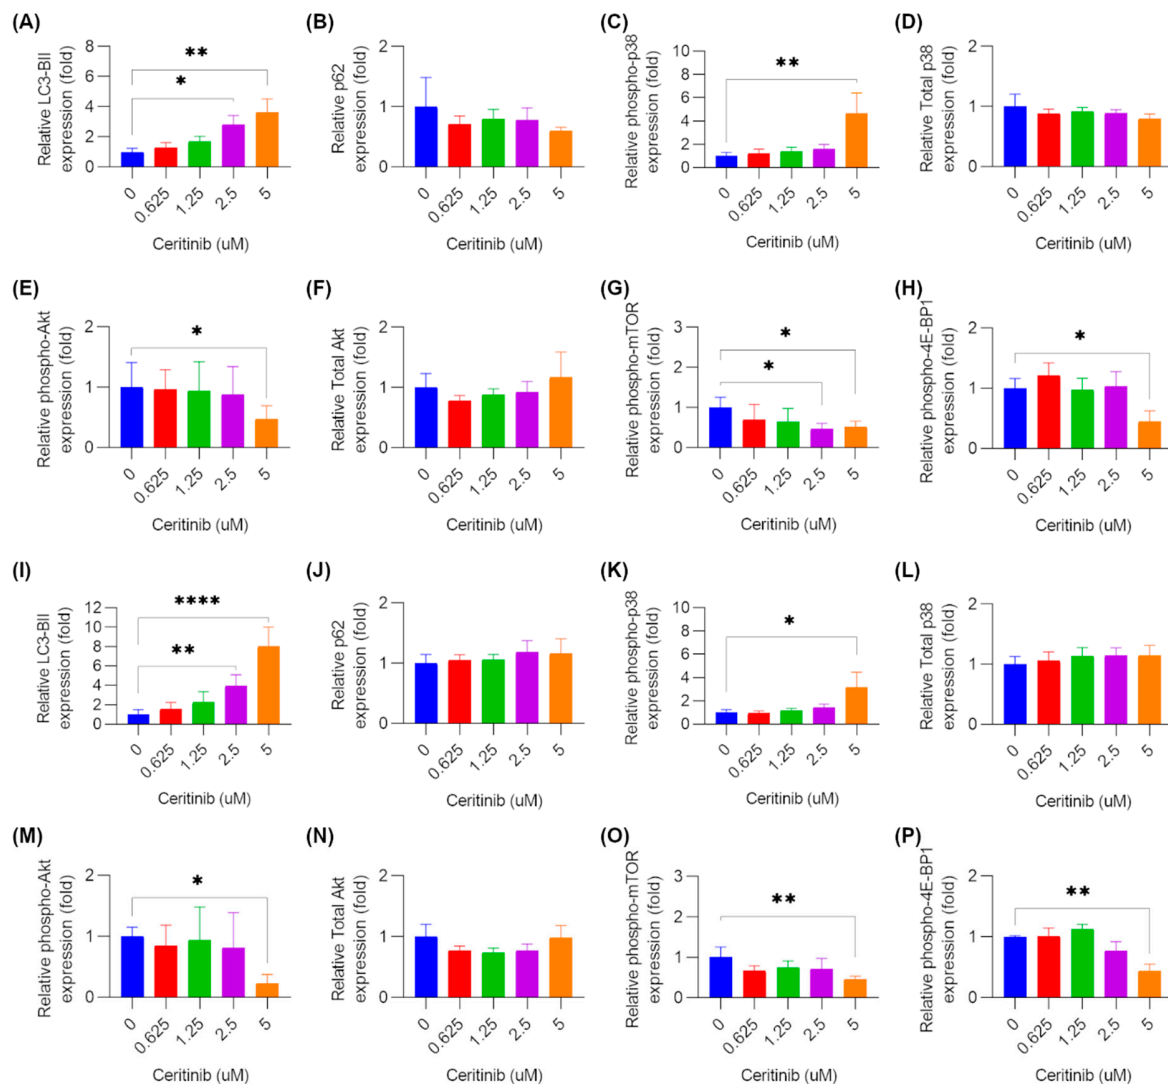

**Figure S5.** Densitometry analysis of Fig. 4C. Densitometry measurement was performed by ImageJ. Protein/GAPDH ratio for each experiment was determined. The average of ratio was calculated, and vehicle sample was referred as 1. The data are presented as means  $\pm$  SEM of four independent experiments. \* $p < 0.005$ , \*\* $p < 0.01$ , \*\*\* $p < 0.001$ , \*\*\*\* $p < 0.0001$  compared to vehicle.
