# Supplementary material
Source: MDPI journal article supplement (https://www.mdpi.com/1424-8247/17/2/197)
Supplement: s1 [file s1]

**Table S1** Primary screening of tyrosine kinase inhibitors.

| Name                               | Viability % (10 $\mu$ M) | Name                                      | Viability % (10 $\mu$ M) |
|------------------------------------|--------------------------|-------------------------------------------|--------------------------|
| Volasertib                         | -103.10                  | Neratinib                                 | 32.22                    |
| Afatinib                           | -43.63                   | Sorafenib                                 | 33.56                    |
| Entrectinib                        | -42.60                   | Ceritinib                                 | 35.16                    |
| Fedratinib (hydrochloride hydrate) | -38.08                   | Asciminib (hydrochloride)                 | 36.35                    |
| Cobimetinib                        | -30.39                   | Sunitinib                                 | 37.15                    |
| Binimetinib                        | -25.86                   | Gilteritinib                              | 37.34                    |
| Cobimetinib (hemifumarate)         | -21.13                   | Brigatinib                                | 39.57                    |
| Copanlisib (dihydrochloride)       | -18.68                   | Icotinib                                  | 41.44                    |
| Filgotinib                         | -17.72                   | Lonafarnib                                | 45.28                    |
| Ponatinib                          | -12.81                   | Masitinib (mesylate)                      | 46.18                    |
| Masitinib                          | -11.87                   | Sorafenib (Tosylate)                      | 48.87                    |
| Crizotinib                         | -8.03                    | Trametinib                                | 49.69                    |
| Lapatinib (ditosylate monohydrate) | -7.83                    | Lazertinib                                | 50.91                    |
| Imatinib (Mesylate)                | -6.92                    | Nilotinib                                 | 51.45                    |
| Dacomitinib                        | -6.34                    | Regorafenib (monohydrate)                 | 51.59                    |
| Olverembatinib (dimesylate)        | -5.93                    | Trametinib (DMSO solvate)                 | 57.25                    |
| Fedratinib                         | -5.38                    | Gefitinib                                 | 58.04                    |
| Osimertinib                        | -4.36                    | Nilotinib (monohydrochloride monohydrate) | 59.11                    |
| Infigratinib                       | -3.67                    | Erlotinib (Hydrochloride)                 | 59.80                    |
| Crizotinib (hydrochloride)         | -2.91                    | Tucatinib (hemiethanolate)                | 61.84                    |
| Pacritinib                         | -1.66                    | Lenvatinib                                | 63.19                    |
| Lapatinib (ditosylate)             | 0.45                     | Nintedanib esylate                        | 64.58                    |
| Gilteritinib hemifumarate          | 0.74                     | Flumatinib                                | 64.88                    |
| Gefitinib (hydrochloride)          | 2.01                     | Nintedanib                                | 66.13                    |
| Afatinib (dimalate)                | 2.19                     | Imatinib                                  | 68.57                    |
| Ceritinib dihydrochloride          | 3.00                     | Ibrutinib                                 | 69.46                    |
| Infigratinib phosphate             | 3.12                     | Lorlatinib                                | 70.48                    |
| Bortezomib                         | 4.95                     | Toceranib                                 | 70.96                    |
| Alectinib                          | 6.33                     | Erlotinib                                 | 71.72                    |
| Olverembatinib                     | 6.35                     | Asciminib                                 | 74.70                    |
| Toceranib (phosphate)              | 6.87                     | Baricitinib (phosphate)                   | 77.61                    |
| Lapatinib                          | 7.29                     | Flumatinib (mesylate)                     | 78.47                    |
| Fostamatinib Disodium              | 9.66                     | Icotinib (Hydrochloride)                  | 78.48                    |
| Osimertinib (mesylate)             | 10.69                    | Ibrutinib (Racemate)                      | 82.00                    |
| Olmutinib                          | 11.41                    | Acalabrutinib                             | 83.86                    |
| Almonertinib                       | 12.10                    | Tirabrutinib                              | 84.27                    |
| Sulfatinib                         | 13.29                    | Tucatinib                                 | 84.71                    |
| Dinaciclib                         | 14.54                    | Zanubrutinib                              | 85.99                    |
| Almonertinib (mesylate)            | 15.34                    | Upadacitinib                              | 86.64                    |

|                                     |       |                              |        |
|-------------------------------------|-------|------------------------------|--------|
| Pemigatinib                         | 17.40 | Lenvatinib (mesylate)        | 90.32  |
| Futibatinib                         | 18.46 | Ruxolitinib                  | 90.71  |
| Almonertinib (hydrochloride)        | 18.51 | Tirabrutinib (hydrochloride) | 92.67  |
| Mobocertinib (succinate)            | 19.88 | Abrocitinib                  | 93.84  |
| Selumetinib                         | 21.71 | Ruxolitinib (S enantiomer)   | 94.64  |
| Fostamatinib (disodium hexahydrate) | 21.82 | Pexidartinib                 | 94.94  |
| Sunitinib (Malate)                  | 22.48 | Ruxolitinib (phosphate)      | 95.32  |
| Regorafenib                         | 24.57 | Sirnotinib                   | 96.56  |
| Aleclinib (Hydrochloride)           | 24.71 | Pexidartinib (hydrochloride) | 98.10  |
| Erdafitinib                         | 25.41 | Oclacitinib (maleate)        | 98.76  |
| Fostamatinib                        | 26.41 | Orelabrutinib                | 100.12 |
| Bosutinib                           | 28.36 | Savolitinib                  | 101.81 |
| Pazopanib                           | 30.40 | Baricitinib                  | 102.62 |
| Avapritinib                         | 30.81 | Quizartinib                  | 104.22 |
| Selumetinib (sulfate)               | 30.81 | Capmatinib                   | 104.47 |
| Vandetanib                          | 31.54 | Tofacitinib                  | 108.11 |
| Peficitinib                         | 31.85 | Osimertinib (dimesylate)     | 548.15 |

**Table S2** Secondary screening of tyrosine kinase inhibitors.

|                                    | Concentrations |          |          |          |          |
|------------------------------------|----------------|----------|----------|----------|----------|
| Name                               | 0.01 uM        | 0.1 uM   | 1 uM     | 10 uM    | IC50     |
| Ceritinib dihydrochloride          | 82.6332        | 74.66701 | 16.90574 | -0.12807 | 0.236473 |
| Fedratinib                         | 122.9252       | 73.71926 | 16.85451 | 0.256148 | 0.278693 |
| Fedratinib (hydrochloride hydrate) | 120.702        | 115.7593 | 3.044413 | 2.256447 | 0.431779 |
| Pacritinib                         | 110.7229       | 119.1161 | 6.47482  | 1.370332 | 0.466223 |
| Entrectinib                        | 110.7268       | 85.7049  | 31.1296  | 6.063923 | 0.509367 |
| Ponatinib                          | 132.0917       | 145.5946 | 68.62464 | 2.005731 | 2.164192 |
| Cobimetinib (hemifumarate)         | 109.1944       | 109.7636 | 78.52452 | 1.641856 | 2.269627 |
| Crizotinib                         | 122.7715       | 116.0348 | 82.94057 | -0.33299 | 2.482087 |
| Afatinib                           | 114.12         | 119.8774 | 94.04553 | 2.539405 | 3.191171 |
| Olverembatinib (dimesylate)        | 104.2902       | 106.3634 | 103.628  | 2.159516 | 3.55028  |
| Crizotinib (hydrochloride)         | 109.1332       | 117.0845 | 101.8983 | 4.118911 | 3.669138 |
| Osimertinib                        | 119.877        | 119.6721 | 113.2684 | -0.53791 | 3.976552 |
| Copanlisib (dihydrochloride)       | 121.5849       | 129.5096 | 115.4116 | 1.07268  | 4.254929 |
| Olverembatinib                     | 115.1594       | 138.6792 | 152.2121 | 1.7892   | 6.185381 |
| Binimetinib                        | 113.45         | 121.6495 | 100.5754 | 34.64397 | 7.151511 |
| Volasertib                         | 102.6708       | 69.57093 | 59.9387  | 56.19527 | 7.415706 |
| Gefitinib (hydrochloride)          | 125.6584       | 128.2435 | 137.352  | 30.36965 | 9.312106 |
| Lapatinib (ditosylate monohydrate) | 133.3897       | 163.2278 | 153.9261 | 32.85818 | 11.50228 |
| Infigratinib phosphate             | 145.3491       | 145.9773 | 153.2979 | 41.41097 | 13.96846 |
| Lapatinib (ditosylate)             | 136.5194       | 131.8602 | 128.9483 | 50.59952 | 15.0874  |
| Infigratinib                       | 91.41906       | 99.43648 | 82.68443 | 63.49898 | 15.50367 |
| Imatinib (Mesylate)                | 123.2665       | 123.9188 | 143.8753 | 51.2201  | 17.02592 |
| Lapatinib                          | 130.8888       | 130.5823 | 141.3748 | 59.58844 | 22.3279  |
| Masitinib                          | 87.27325       | 126.1733 | 128.2177 | 62.59718 | 22.58893 |
| Afatinib (dimaleate)               | 131.3754       | 122.9943 | 129.9785 | 62.9298  | 23.20926 |
| Dacomitinib                        | 119.0455       | 129.5534 | 119.9869 | 67.18476 | 25.75415 |
| Larotrectinib                      | 109.8538       | 121.8892 | 110.0935 | 85.03956 | 65.95993 |
| Alectinib                          | 120.9016       | 123.207  | 119.5184 | 84.34939 | 69.04756 |
| Cobimetinib                        | 115.4772       | 123.1173 | 117.4037 | 93.19177 | 207.8059 |

**Table S3** Antibody array analysis with respective co-ordinates.

| Coordinate | Target/Control       | Phosphorylation Site | Vehicle | Ceritinib | Fold Change |
|------------|----------------------|----------------------|---------|-----------|-------------|
| A-A1, A2   | Reference Spot       | —                    |         |           |             |
| A-A3, A4   | p38 $\alpha$         | T180/Y182            | 1792.5  | 1425      | 0.79        |
| A-A5, A6   | ERK1/2               | T202/Y204, T185/Y187 | 7134.5  | 6173      | 0.87        |
| A-A7, A8   | JNK 1/2/3            | T183/Y185, T221/Y223 | 5505    | 4388      | 0.80        |
| A-A9, A10  | GSK-3 $\alpha/\beta$ | S21/S9               | 10039.5 | 6787.5    | 0.68        |
| B-A13, A14 | p53                  | S392                 | 1321    | 847       | 0.64        |
| B-A17, A18 | Reference Spot       | —                    |         |           |             |
| A-B3, B4   | EGF R                | Y1086                | 2746    | 2278.5    | 0.83        |
| A-B5, B6   | MSK1/2               | S376/S360            | 1864.5  | 1529.5    | 0.82        |
| A-B7, B8   | AMPK $\alpha$ 1      | T183                 | 2775.5  | 3469      | 1.25        |
| A-B9, B10  | Akt 1/2/3            | S473                 | 4891.5  | 3212.5    | 0.66        |
| B-B11, B12 | Akt 1/2/3            | T308                 | 1140    | 1081      | 0.95        |
| B-B13, B14 | p53                  | S46                  | 1376    | 1174.5    | 0.85        |
| A-C1, C2   | TOR                  | S2448                | 1398.5  | 1089      | 0.78        |
| A-C3, C4   | CREB                 | S133                 | 2300.5  | 1941.5    | 0.84        |
| A-C5, C6   | HSP27                | S78/S82              | 1398    | 1053.5    | 0.75        |
| A-C7, C8   | AMPK $\alpha$ 2      | T172                 | 2217.5  | 1781      | 0.80        |
| A-C9, C10  | $\beta$ -Catenin     | —                    | 1656    | 1156.5    | 0.70        |
| B-C11, C12 | p70 S6 Kinase        | T389                 | 864.5   | 802       | 0.93        |
| B-C13, C14 | p53                  | S15                  | 513     | 510       | 0.99        |
| B-C15, C16 | c-Jun                | S63                  | 5203.5  | 8592      | 1.65        |
| A-D1, D2   | Src                  | Y419                 | 3072    | 2700.5    | 0.88        |
| A-D3, D4   | Lyn                  | Y397                 | 1277.5  | 983       | 0.77        |
| A-D5, D6   | Lck                  | Y394                 | 914.5   | 693       | 0.76        |
| A-D7, D8   | STAT2                | Y689                 | 2375.5  | 1710.5    | 0.72        |
| A-D9, D10  | STAT5a               | Y694                 | 821.5   | 664.5     | 0.81        |
| B-D11, D12 | p70 S6 Kinase        | T421/S424            | 978     | 937.5     | 0.96        |
| B-D13, D14 | RSK1/2/3             | S380/S386/S377       | 696     | 639.5     | 0.92        |
| B-D15, D16 | eNOS                 | S1177                | 651     | 665       | 1.02        |

|            |                        |           |        |        |      |
|------------|------------------------|-----------|--------|--------|------|
| A-E1, E2   | Fyn                    | Y420      | 1148.5 | 753    | 0.66 |
| A-E3, E4   | Yes                    | Y426      | 1887   | 1544   | 0.82 |
| A-E5, E6   | Fgr                    | Y412      | 824.5  | 578.5  | 0.70 |
| A-E7, E8   | STAT6                  | Y641      | 1823.5 | 1340   | 0.73 |
| A-E9, E10  | STAT5b                 | Y699      | 1062.5 | 901.5  | 0.85 |
| B-E11, E12 | STAT3                  | Y705      | 948    | 904    | 0.95 |
| B-E13, E14 | p27                    | T198      | 669.5  | 722    | 1.08 |
| B-E15, E16 | PLC- $\gamma$ 1        | Y783      | 1176   | 1148   | 0.98 |
| A-F1, F2   | Hck                    | Y411      | 1655   | 1158.5 | 0.70 |
| A-F3, F4   | Chk-2                  | T68       | 2213   | 1722.5 | 0.78 |
| A-F5, F6   | FAK                    | Y397      | 4383   | 3055.5 | 0.70 |
| A-F7, F8   | PDGF R $\beta$         | Y751      | 1294   | 1001.5 | 0.77 |
| A-F9, F10  | STAT5a/b               | Y694/Y699 | 1751   | 1327.5 | 0.76 |
| B-F11, F12 | STAT3                  | S727      | 1594   | 1437   | 0.90 |
| B-F13, F14 | WNK1                   | T60       | 2566   | 2391   | 0.93 |
| B-F15, F16 | PYK2                   | Y402      | 1162   | 1129.5 | 0.97 |
| A-G1, G2   | Reference Spot         | —         |        |        |      |
| A-G3, G4   | PRAS40                 | T246      | 6143   | 3693   | 0.60 |
| A-G9, G10  | PBS (Negative Control) | —         |        |        |      |
| B-G11, G12 | HSP60                  | —         | 4033.5 | 3768   | 0.93 |
| B-G17, G18 | PBS (Negative Control) | —         |        |        |      |

**Table S4** ZIP synergy scores ceritinib and cisplatin combination in K KU-M213, K KU-100 and RBE cells.

| Ceri | Cis  | Unit | K KU-M213           |       | K KU-100            |       | RBE                 |       |
|------|------|------|---------------------|-------|---------------------|-------|---------------------|-------|
|      |      |      | Relative Inhibition | ZIP   | Relative Inhibition | ZIP   | Relative Inhibition | ZIP   |
| 0    | 0    | μM   | 0.00 ± 0.00         | 0.00  | 0.00 ± 0.00         | 0.00  | 0.00 ± 0.00         | 0.00  |
| 0.62 | 0    | μM   | 8.15 ± 4.66         | 0.00  | 18.17 ± 2.19        | 0.00  | 15.17 ± 9.41        | 0.00  |
| 1.25 | 0    | μM   | 42.93 ± 9.40        | 0.00  | 25.51 ± 3.95        | 0.00  | 35.90 ± 7.86        | 0.00  |
| 2.5  | 0    | μM   | 97.74 ± 4.03        | 0.00  | 48.69 ± 8.18        | 0.00  | 89.47 ± 6.44        | 0.00  |
| 5    | 0    | μM   | 98.52 ± 0.56        | 0.00  | 96.77 ± 1.82        | 0.00  | 95.96 ± 2.08        | 0.00  |
| 0    | 6.25 | μM   | 8.75 ± 4.18         | 0.00  | 19.95 ± 2.15        | 0.00  | 7.73 ± 3.00         | 0.00  |
| 0.62 | 6.25 | μM   | 25.39 ± 8.39        | 19.55 | 30.04 ± 3.29        | 10.19 | 28.99 ± 5.88        | 16.02 |
| 1.25 | 6.25 | μM   | 48.19 ± 10.80       | 8.90  | 37.56 ± 2.05        | 10.39 | 43.38 ± 5.97        | 12.72 |
| 2.5  | 6.25 | μM   | 98.13 ± 4.94        | -1.38 | 62.22 ± 6.00        | 12.99 | 89.92 ± 4.11        | -0.93 |
| 5    | 6.25 | μM   | 98.41 ± 0.84        | 0.99  | 96.96 ± 1.40        | -0.09 | 96.46 ± 1.97        | 1.25  |
| 0    | 12.5 | μM   | 23.35 ± 9.61        | 0.00  | 39.13 ± 2.00        | 0.00  | 25.30 ± 1.55        | 0.00  |
| 0.62 | 12.5 | μM   | 46.72 ± 9.69        | 19.59 | 49.48 ± 1.96        | 10.65 | 36.25 ± 3.57        | 9.77  |
| 1.25 | 12.5 | μM   | 64.24 ± 13.01       | 10.31 | 51.94 ± 1.12        | 8.61  | 56.35 ± 9.92        | 11.79 |
| 2.5  | 12.5 | μM   | 97.68 ± 4.25        | -2.02 | 64.43 ± 3.38        | 2.94  | 89.92 ± 5.54        | -1.45 |
| 5    | 12.5 | μM   | 98.04 ± 0.68        | 0.36  | 96.15 ± 1.39        | -1.35 | 94.98 ± 1.83        | -1.70 |
| 0    | 25   | μM   | 46.89 ± 6.56        | 0.00  | 51.47 ± 3.16        | 0.00  | 32.52 ± 2.97        | 0.00  |
| 0.62 | 25   | μM   | 51.07 ± 8.40        | 5.81  | 63.14 ± 1.94        | 12.61 | 46.08 ± 2.99        | 9.18  |
| 1.25 | 25   | μM   | 65.81 ± 8.42        | -0.08 | 67.01 ± 1.47        | 10.11 | 63.49 ± 7.28        | 12.65 |
| 2.5  | 25   | μM   | 97.43 ± 2.25        | -1.50 | 69.31 ± 1.74        | -0.91 | 88.79 ± 3.81        | -3.26 |
| 5    | 25   | μM   | 97.92 ± 0.70        | -0.93 | 96.33 ± 1.50        | -2.17 | 94.24 ± 1.35        | -3.06 |
| 0    | 50   | μM   | 70.18 ± 2.54        | 0.00  | 66.01 ± 5.41        | 0.00  | 44.47 ± 5.41        | 0.00  |
| 0.62 | 50   | μM   | 77.43 ± 5.31        | 6.87  | 71.78 ± 4.12        | 4.77  | 54.15 ± 2.62        | 8.67  |
| 1.25 | 50   | μM   | 83.14 ± 4.85        | 2.13  | 72.66 ± 2.07        | 3.78  | 70.23 ± 6.20        | 10.66 |
| 2.5  | 50   | μM   | 98.11 ± 0.65        | -1.92 | 78.20 ± 3.54        | -0.86 | 91.80 ± 2.61        | -1.54 |
| 5    | 50   | μM   | 98.44 ± 0.55        | -0.88 | 97.15 ± 1.62        | -1.81 | 95.40 ± 1.26        | -2.76 |
